# Supplementary material for: Pervasive Differential Splicing in Marek’s Disease Virus Can Discriminate CVI-988 Vaccine Strain from RB-1B Very Virulent Strain in Chicken Embryonic Fibroblasts
Source: PubMed Central journal article supplement (PMC7150913; doi:10.3390/v12030329), 2020-03-18

# Pervasive Differential Splicing in Marek's Disease Virus can Discriminate CVI-988 Vaccine Strain from RB-1B Very Virulent Strain in Chicken Embryonic Fibroblasts

## Supplementary materials

Yashar Sadigh <sup>1,†</sup>, Abdessamad Tahiri-Alaoui <sup>2,†</sup>, Stephen Spatz <sup>3</sup>, Venugopal Nair <sup>1,\*</sup> and Paolo Ribeca <sup>4,5,\*</sup>

<sup>1</sup> Avian Viral Oncogenesis, The Pirbright Institute, Ash Road, Woking GU24 0NF, UK; yashar.sadigh@pirbright.ac.uk

<sup>2</sup> Clinical BioManufacturing Facility, The Jenner Institute, University of Oxford, Old Road, Headington, Oxford OX3 7JT, UK; abdessamad.tahiri-alaoui@ndm.ox.ac.uk

<sup>3</sup> US National Poultry Research Center, 934 College Station Road, Athens, GA 30605, USA; stephen.spatz@ars.usda.gov

<sup>4</sup> Integrative Biology and Bioinformatics, The Pirbright Institute, Ash Road, Woking GU24 0NF, UK;

<sup>5</sup> Biomathematics and Statistics Scotland (BioSS), James Clerk Maxwell Building, Peter Guthrie Tait Road, The King's Buildings, Edinburgh EH9 3FD, UK;

\* Correspondence: venugopal.nair@pirbright.ac.uk (V.N.); paolo.ribeca@bioss.ac.uk (P.R.); Tel.: +44 1483232441 (V.N.), +44 1316507547 (P.R.)

† These authors contributed equally to this work.

**Table S1.** List of introns that are: (**Panel A**) spliced in MDV strain CVI-988; (**Panel B**) spliced in MDV strain RB-1B – after filtering out introns with low-coverage (<10 reads) and introns which are not spliced in all biological replicates. To make splicing events occurring in different MDV strains comparable, all introns are listed in terms of coordinates based on the genomic sequence of MDV reference strain MD5 (NCBI accession NC\_002229.3). Mapping the introns occurring in the RB-1B/CVI-988 transcriptomes to the MD5 genome was possible thanks to the extremely high sequence similarity (>99%) shared by MD5, RB-1B and CVI-988.

| MDV strain                                      | Strand | Position of first intron nucleotide | Position of last intron nucleotide | Read coverage | MDV strain                                    | Strand | Position of first intron nucleotide | Position of last intron nucleotide | Read coverage |
|-------------------------------------------------|--------|-------------------------------------|------------------------------------|---------------|-----------------------------------------------|--------|-------------------------------------|------------------------------------|---------------|
| <b>A. Introns spliced in MDV strain CVI-988</b> |        |                                     |                                    |               | <b>B. Introns spliced in MDV strain RB-1B</b> |        |                                     |                                    |               |
| MD5                                             | +      | 103285                              | 103388                             | 9435          | MD5                                           | +      | 138129                              | 138303                             | 4052          |
| MD5                                             | +      | 17540                               | 17621                              | 4753          | MD5                                           | -      | 3317                                | 3491                               | 3974          |
| MD5                                             | +      | 138129                              | 138303                             | 4415          | MD5                                           | -      | 3083                                | 3180                               | 3378          |
| MD5                                             | -      | 3317                                | 3491                               | 4325          | MD5                                           | +      | 138440                              | 138537                             | 3366          |
| MD5                                             | +      | 103244                              | 103388                             | 4145          | MD5                                           | +      | 128516                              | 130900                             | 3113          |
| MD5                                             | -      | 3083                                | 3180                               | 3994          | MD5                                           | -      | 10720                               | 13104                              | 3105          |
| MD5                                             | +      | 138440                              | 138537                             | 3972          | MD5                                           | +      | 17540                               | 17621                              | 2043          |
| MD5                                             | +      | 128516                              | 130900                             | 3666          | MD5                                           | +      | 103285                              | 103388                             | 1816          |
| MD5                                             | -      | 10720                               | 13104                              | 3663          | MD5                                           | +      | 129866                              | 130900                             | 1013          |
| MD5                                             | -      | 127855                              | 128016                             | 1893          | MD5                                           | -      | 10720                               | 11754                              | 1006          |
| MD5                                             | +      | 13604                               | 13765                              | 1801          | MD5                                           | -      | 127855                              | 128016                             | 972           |
| MD5                                             | -      | 126904                              | 127407                             | 1236          | MD5                                           | +      | 13604                               | 13765                              | 953           |
| MD5                                             | +      | 129866                              | 130900                             | 879           | MD5                                           | +      | 103244                              | 103388                             | 917           |
| MD5                                             | -      | 10720                               | 11754                              | 876           | MD5                                           | -      | 10720                               | 13048                              | 825           |

|     |   |        |        |     |     |   |        |        |     |
|-----|---|--------|--------|-----|-----|---|--------|--------|-----|
| MD5 | + | 14631  | 14700  | 778 | MD5 | + | 128572 | 130900 | 814 |
| MD5 | - | 126904 | 128016 | 659 | MD5 | - | 126904 | 127407 | 588 |
| MD5 | - | 111959 | 112359 | 646 | MD5 | - | 10720  | 12856  | 571 |
| MD5 | - | 164391 | 164465 | 596 | MD5 | + | 128764 | 130900 | 564 |
| MD5 | + | 56222  | 57133  | 547 | MD5 | - | 164391 | 164465 | 533 |
| MD5 | - | 10720  | 12856  | 516 | MD5 | + | 14631  | 14700  | 409 |
| MD5 | + | 128764 | 130900 | 508 | MD5 | + | 13604  | 14477  | 230 |
| MD5 | - | 10720  | 13048  | 489 | MD5 | - | 126904 | 128016 | 219 |
| MD5 | + | 128572 | 130900 | 481 | MD5 | - | 170766 | 170836 | 219 |
| MD5 | + | 14631  | 17621  | 481 | MD5 | + | 147608 | 147678 | 213 |
| MD5 | + | 13604  | 14477  | 394 | MD5 | - | 127939 | 128016 | 202 |
| MD5 | + | 23570  | 25010  | 388 | MD5 | - | 170114 | 170198 | 191 |
| MD5 | + | 130693 | 130900 | 361 | MD5 | + | 13604  | 13681  | 188 |
| MD5 | - | 10720  | 10927  | 351 | MD5 | + | 23570  | 25010  | 186 |
| MD5 | - | 170766 | 170836 | 293 | MD5 | - | 170288 | 170657 | 147 |
| MD5 | + | 147608 | 147678 | 289 | MD5 | + | 147123 | 147209 | 138 |
| MD5 | - | 127939 | 128016 | 279 | MD5 | - | 164391 | 170037 | 138 |
| MD5 | + | 43966  | 44225  | 270 | MD5 | + | 148246 | 148330 | 137 |
| MD5 | + | 13604  | 13681  | 261 | MD5 | + | 147787 | 148156 | 132 |
| MD5 | - | 170114 | 170198 | 260 | MD5 | - | 171235 | 171321 | 127 |
| MD5 | - | 130958 | 131423 | 245 | MD5 | - | 127917 | 128016 | 127 |
| MD5 | + | 48633  | 48904  | 245 | MD5 | - | 3099   | 3180   | 122 |
| MD5 | + | 42651  | 42884  | 237 | MD5 | + | 138440 | 138521 | 121 |
| MD5 | + | 10197  | 10662  | 232 | MD5 | + | 130693 | 130900 | 118 |
| MD5 | + | 49048  | 50816  | 221 | MD5 | - | 10720  | 10927  | 117 |
| MD5 | - | 170288 | 170657 | 203 | MD5 | + | 13604  | 13703  | 116 |
| MD5 | - | 127917 | 128016 | 201 | MD5 | + | 42651  | 42884  | 102 |
| MD5 | + | 117624 | 118995 | 194 | MD5 | + | 56222  | 57133  | 97  |
| MD5 | - | 164391 | 170037 | 192 | MD5 | + | 39404  | 42884  | 91  |
| MD5 | + | 148246 | 148330 | 192 | MD5 | - | 130958 | 131423 | 89  |
| MD5 | + | 10755  | 11811  | 191 | MD5 | + | 10197  | 10662  | 83  |
| MD5 | + | 147787 | 148156 | 190 | MD5 | + | 14631  | 17621  | 81  |
| MD5 | - | 129809 | 130865 | 187 | MD5 | - | 126269 | 128016 | 70  |
| MD5 | + | 13604  | 13703  | 179 | MD5 | + | 14218  | 14477  | 66  |
| MD5 | + | 118203 | 118995 | 168 | MD5 | - | 129809 | 130865 | 64  |
| MD5 | + | 44447  | 46036  | 166 | MD5 | + | 13602  | 13765  | 62  |
| MD5 | - | 150945 | 152141 | 163 | MD5 | + | 117624 | 118995 | 62  |
| MD5 | + | 166303 | 167499 | 162 | MD5 | + | 162270 | 162416 | 61  |
| MD5 | + | 147123 | 147209 | 158 | MD5 | - | 126904 | 127437 | 60  |
| MD5 | + | 14218  | 14477  | 153 | MD5 | - | 127855 | 128018 | 60  |
| MD5 | - | 171235 | 171321 | 151 | MD5 | + | 10755  | 11811  | 60  |
| MD5 | + | 162270 | 162416 | 148 | MD5 | - | 170772 | 170836 | 55  |
| MD5 | - | 3099   | 3180   | 143 | MD5 | - | 48026  | 48551  | 55  |
| MD5 | + | 138440 | 138521 | 141 | MD5 | + | 147608 | 147672 | 53  |
| MD5 | + | 43444  | 43723  | 136 | MD5 | + | 141646 | 147059 | 52  |
| MD5 | - | 126269 | 128016 | 130 | MD5 | - | 171385 | 176798 | 51  |
| MD5 | + | 39404  | 42884  | 121 | MD5 | + | 144724 | 144996 | 51  |
| MD5 | + | 103562 | 104515 | 120 | MD5 | - | 10720  | 14783  | 50  |

|     |   |        |        |     |     |   |        |        |    |
|-----|---|--------|--------|-----|-----|---|--------|--------|----|
| MD5 | + | 17406  | 17621  | 116 | MD5 | - | 173448 | 173720 | 48 |
| MD5 | - | 108478 | 109362 | 115 | MD5 | - | 164391 | 170836 | 48 |
| MD5 | - | 110865 | 111173 | 111 | MD5 | + | 48633  | 48904  | 47 |
| MD5 | + | 13602  | 13765  | 109 | MD5 | - | 131633 | 131762 | 45 |
| MD5 | - | 127855 | 128018 | 102 | MD5 | + | 145239 | 147059 | 44 |
| MD5 | + | 9858   | 9987   | 101 | MD5 | + | 9858   | 9987   | 44 |
| MD5 | - | 131633 | 131762 | 101 | MD5 | + | 13604  | 17621  | 44 |
| MD5 | + | 100540 | 103388 | 97  | MD5 | - | 171385 | 173205 | 43 |
| MD5 | - | 10720  | 14783  | 97  | MD5 | + | 128516 | 129736 | 43 |
| MD5 | + | 13604  | 14700  | 96  | MD5 | - | 11884  | 13104  | 42 |
| MD5 | - | 48026  | 48551  | 94  | MD5 | + | 100540 | 103388 | 41 |
| MD5 | + | 50934  | 55652  | 81  | MD5 | + | 166303 | 167499 | 41 |
| MD5 | + | 37541  | 42884  | 81  | MD5 | - | 150945 | 152141 | 40 |
| MD5 | - | 126904 | 128018 | 71  | MD5 | + | 128572 | 129736 | 37 |
| MD5 | - | 171385 | 173205 | 69  | MD5 | + | 118203 | 118995 | 37 |
| MD5 | + | 145239 | 147059 | 68  | MD5 | + | 43966  | 44225  | 36 |
| MD5 | + | 43444  | 43808  | 67  | MD5 | + | 13602  | 14477  | 35 |
| MD5 | - | 170772 | 170836 | 66  | MD5 | - | 11884  | 13048  | 34 |
| MD5 | + | 147608 | 147672 | 64  | MD5 | + | 13604  | 14700  | 34 |
| MD5 | + | 144724 | 144996 | 62  | MD5 | - | 164391 | 170657 | 34 |
| MD5 | + | 161471 | 162416 | 60  | MD5 | - | 156473 | 156727 | 32 |
| MD5 | + | 14631  | 14710  | 60  | MD5 | - | 164391 | 166164 | 31 |
| MD5 | - | 173448 | 173720 | 59  | MD5 | - | 174496 | 175095 | 31 |
| MD5 | - | 112500 | 112881 | 58  | MD5 | - | 135161 | 135780 | 30 |
| MD5 | + | 5840   | 6459   | 57  | MD5 | + | 5840   | 6459   | 30 |
| MD5 | - | 63796  | 64600  | 56  | MD5 | - | 170625 | 170836 | 30 |
| MD5 | - | 135161 | 135780 | 55  | MD5 | + | 143349 | 143948 | 29 |
| MD5 | - | 110697 | 111173 | 55  | MD5 | + | 147608 | 147819 | 29 |
| MD5 | - | 164391 | 170836 | 53  | MD5 | + | 148407 | 150128 | 29 |
| MD5 | + | 138002 | 138303 | 52  | MD5 | - | 168316 | 170037 | 28 |
| MD5 | - | 165820 | 166164 | 51  | MD5 | - | 126899 | 127407 | 27 |
| MD5 | - | 126899 | 127407 | 50  | MD5 | - | 124414 | 124816 | 26 |
| MD5 | - | 124414 | 124816 | 49  | MD5 | - | 110865 | 111173 | 26 |
| MD5 | + | 152280 | 152624 | 48  | MD5 | - | 164391 | 176798 | 25 |
| MD5 | + | 161498 | 162416 | 48  | MD5 | + | 161471 | 162416 | 25 |
| MD5 | + | 159632 | 162416 | 48  | MD5 | - | 126904 | 128018 | 24 |
| MD5 | + | 49048  | 49142  | 48  | MD5 | + | 43444  | 43723  | 24 |
| MD5 | - | 10720  | 12337  | 48  | MD5 | + | 17406  | 17621  | 24 |
| MD5 | + | 129283 | 130900 | 47  | MD5 | - | 11884  | 12856  | 23 |
| MD5 | - | 156473 | 156727 | 47  | MD5 | + | 103562 | 104515 | 23 |
| MD5 | + | 50934  | 56108  | 45  | MD5 | + | 128764 | 129736 | 23 |
| MD5 | + | 5558   | 5677   | 43  | MD5 | + | 138002 | 138303 | 22 |
| MD5 | - | 135943 | 136062 | 43  | MD5 | - | 126269 | 127407 | 20 |
| MD5 | + | 43021  | 43166  | 43  | MD5 | + | 21286  | 21379  | 20 |
| MD5 | + | 13604  | 17621  | 42  | MD5 | - | 111959 | 112277 | 19 |
| MD5 | + | 115207 | 118995 | 42  | MD5 | + | 49048  | 50816  | 19 |
| MD5 | - | 3317   | 3618   | 42  | MD5 | - | 168978 | 170037 | 19 |
| MD5 | - | 143380 | 152141 | 41  | MD5 | - | 164391 | 168893 | 18 |

|     |   |        |        |    |     |   |        |        |    |
|-----|---|--------|--------|----|-----|---|--------|--------|----|
| MD5 | - | 164391 | 170657 | 41 | MD5 | + | 148407 | 149466 | 18 |
| MD5 | + | 166303 | 175064 | 40 | MD5 | - | 165820 | 166164 | 18 |
| MD5 | + | 42798  | 42884  | 40 | MD5 | - | 127855 | 128012 | 18 |
| MD5 | + | 43021  | 43723  | 39 | MD5 | + | 137675 | 138303 | 17 |
| MD5 | + | 37541  | 39215  | 38 | MD5 | + | 14631  | 14710  | 17 |
| MD5 | + | 50934  | 51306  | 38 | MD5 | + | 129283 | 130900 | 17 |
| MD5 | + | 21286  | 21379  | 38 | MD5 | - | 10720  | 12337  | 17 |
| MD5 | + | 120317 | 120767 | 38 | MD5 | - | 3317   | 3945   | 16 |
| MD5 | + | 13602  | 14477  | 37 | MD5 | - | 170288 | 170670 | 16 |
| MD5 | + | 46711  | 47839  | 34 | MD5 | + | 17521  | 17621  | 16 |
| MD5 | - | 72063  | 72993  | 34 | MD5 | - | 131683 | 131762 | 16 |
| MD5 | - | 126269 | 127407 | 33 | MD5 | + | 42798  | 42884  | 16 |
| MD5 | + | 44447  | 48559  | 32 | MD5 | + | 152280 | 152624 | 15 |
| MD5 | - | 107252 | 108334 | 31 | MD5 | + | 161498 | 162416 | 15 |
| MD5 | + | 21581  | 25010  | 31 | MD5 | + | 13608  | 13765  | 15 |
| MD5 | + | 13608  | 13765  | 31 | MD5 | + | 37541  | 42884  | 15 |
| MD5 | + | 46711  | 48559  | 30 | MD5 | + | 149551 | 149915 | 14 |
| MD5 | - | 107030 | 109362 | 30 | MD5 | - | 3317   | 3618   | 14 |
| MD5 | - | 166272 | 170037 | 30 | MD5 | + | 49048  | 49142  | 13 |
| MD5 | - | 127855 | 128012 | 30 | MD5 | - | 168529 | 168893 | 13 |
| MD5 | + | 168066 | 169768 | 29 | MD5 | + | 5558   | 5677   | 13 |
| MD5 | - | 148676 | 150378 | 29 | MD5 | - | 135943 | 136062 | 13 |
| MD5 | - | 13584  | 14783  | 29 | MD5 | - | 10720  | 12851  | 13 |
| MD5 | + | 148407 | 152172 | 28 | MD5 | + | 148407 | 152172 | 12 |
| MD5 | + | 135165 | 138303 | 28 | MD5 | + | 168066 | 169768 | 12 |
| MD5 | - | 3317   | 6455   | 28 | MD5 | - | 126983 | 127407 | 12 |
| MD5 | + | 16981  | 17621  | 27 | MD5 | - | 164391 | 170046 | 12 |
| MD5 | - | 10720  | 12469  | 26 | MD5 | + | 147774 | 148156 | 12 |
| MD5 | - | 73286  | 73548  | 26 | MD5 | + | 21290  | 21379  | 11 |
| MD5 | + | 129151 | 130900 | 25 | MD5 | + | 129151 | 130900 | 11 |
| MD5 | + | 126410 | 126729 | 25 | MD5 | + | 126858 | 126943 | 11 |
| MD5 | + | 120343 | 120767 | 25 | MD5 | - | 143380 | 152141 | 11 |
| MD5 | - | 174496 | 175095 | 25 | MD5 | + | 166303 | 175064 | 11 |
| MD5 | + | 143349 | 143948 | 25 | MD5 | + | 144052 | 144604 | 11 |
| MD5 | + | 43021  | 43808  | 25 | MD5 | - | 173840 | 174392 | 11 |
| MD5 | - | 164391 | 170198 | 24 | MD5 | - | 10720  | 12469  | 11 |
| MD5 | - | 126983 | 127407 | 23 | MD5 | - | 46921  | 47956  | 11 |
| MD5 | - | 122846 | 124039 | 23 | MD5 | - | 65190  | 65574  | 10 |
| MD5 | + | 137675 | 138303 | 23 | MD5 | + | 144052 | 144376 | 10 |
| MD5 | - | 3317   | 3945   | 23 | MD5 | - | 174068 | 174392 | 10 |
| MD5 | + | 56222  | 65913  | 23 | MD5 | + | 130045 | 130114 | 10 |
| MD5 | - | 164391 | 170046 | 22 | MD5 | - | 11506  | 11575  | 10 |
| MD5 | - | 150744 | 152141 | 22 | MD5 | + | 115207 | 118995 | 10 |
| MD5 | + | 144052 | 144376 | 22 | MD5 | + | 79750  | 103388 | 10 |
| MD5 | + | 166303 | 167700 | 21 |     |   |        |        |    |
| MD5 | - | 168316 | 170037 | 21 |     |   |        |        |    |
| MD5 | + | 126300 | 126368 | 21 |     |   |        |        |    |
| MD5 | - | 46921  | 47956  | 21 |     |   |        |        |    |

|     |   |        |        |    |
|-----|---|--------|--------|----|
| MD5 | - | 174068 | 174392 | 21 |
| MD5 | + | 148407 | 150128 | 20 |
| MD5 | - | 147498 | 152141 | 20 |
| MD5 | - | 107243 | 108334 | 20 |
| MD5 | - | 47990  | 48551  | 20 |
| MD5 | + | 166303 | 170946 | 20 |
| MD5 | - | 14872  | 15396  | 19 |
| MD5 | + | 5840   | 6671   | 19 |
| MD5 | - | 170288 | 170670 | 19 |
| MD5 | + | 37665  | 42884  | 19 |
| MD5 | - | 97915  | 98336  | 19 |
| MD5 | - | 63796  | 64124  | 18 |
| MD5 | + | 49665  | 50816  | 18 |
| MD5 | + | 144850 | 144996 | 18 |
| MD5 | - | 63796  | 64641  | 18 |
| MD5 | + | 21290  | 21379  | 18 |
| MD5 | + | 166303 | 170579 | 17 |
| MD5 | + | 13602  | 13703  | 17 |
| MD5 | + | 46711  | 48493  | 17 |
| MD5 | + | 65352  | 65913  | 17 |
| MD5 | - | 147865 | 152141 | 17 |
| MD5 | + | 161471 | 162075 | 17 |
| MD5 | - | 132126 | 133050 | 17 |
| MD5 | + | 133179 | 134823 | 17 |
| MD5 | + | 39404  | 42283  | 16 |
| MD5 | + | 129866 | 130599 | 16 |
| MD5 | + | 114816 | 118995 | 16 |
| MD5 | - | 69904  | 72062  | 16 |
| MD5 | - | 3317   | 4065   | 16 |
| MD5 | + | 137555 | 138303 | 16 |
| MD5 | + | 49048  | 50820  | 16 |
| MD5 | + | 147774 | 148156 | 16 |
| MD5 | - | 170625 | 170836 | 16 |
| MD5 | - | 6797   | 8441   | 16 |
| MD5 | - | 131683 | 131762 | 16 |
| MD5 | + | 9858   | 9937   | 16 |
| MD5 | + | 65264  | 65913  | 16 |
| MD5 | + | 158277 | 162416 | 16 |
| MD5 | + | 126858 | 127378 | 16 |
| MD5 | + | 147608 | 147819 | 16 |
| MD5 | + | 43021  | 55652  | 15 |
| MD5 | - | 15548  | 16661  | 15 |
| MD5 | - | 126269 | 128018 | 15 |
| MD5 | + | 17521  | 17621  | 15 |
| MD5 | + | 47947  | 48559  | 15 |
| MD5 | + | 43021  | 44225  | 15 |
| MD5 | + | 9854   | 9987   | 14 |
| MD5 | + | 146193 | 147059 | 14 |

|     |   |        |        |    |
|-----|---|--------|--------|----|
| MD5 | + | 130045 | 130114 | 14 |
| MD5 | - | 11506  | 11575  | 14 |
| MD5 | - | 126904 | 127060 | 14 |
| MD5 | - | 32229  | 32414  | 14 |
| MD5 | - | 107568 | 108334 | 14 |
| MD5 | + | 144494 | 144604 | 14 |
| MD5 | + | 44447  | 48493  | 14 |
| MD5 | - | 124414 | 125781 | 14 |
| MD5 | + | 43021  | 56108  | 14 |
| MD5 | + | 130778 | 130900 | 13 |
| MD5 | - | 173840 | 173950 | 13 |
| MD5 | - | 155921 | 156727 | 13 |
| MD5 | - | 147498 | 150378 | 13 |
| MD5 | + | 168066 | 170946 | 13 |
| MD5 | - | 3083   | 3176   | 13 |
| MD5 | + | 13602  | 14700  | 13 |
| MD5 | + | 128516 | 129736 | 13 |
| MD5 | + | 44447  | 48904  | 13 |
| MD5 | + | 43282  | 43389  | 13 |
| MD5 | + | 44447  | 45636  | 12 |
| MD5 | + | 50934  | 65913  | 12 |
| MD5 | + | 138444 | 138537 | 12 |
| MD5 | - | 53654  | 54762  | 12 |
| MD5 | - | 171385 | 172251 | 12 |
| MD5 | + | 79750  | 91658  | 12 |
| MD5 | - | 171385 | 176798 | 11 |
| MD5 | + | 11901  | 13106  | 11 |
| MD5 | - | 128514 | 129719 | 11 |
| MD5 | - | 173840 | 174392 | 11 |
| MD5 | + | 144052 | 144604 | 11 |
| MD5 | + | 114627 | 118995 | 11 |
| MD5 | + | 58262  | 59074  | 10 |
| MD5 | + | 4834   | 5677   | 10 |
| MD5 | - | 111487 | 112359 | 10 |
| MD5 | + | 141646 | 147059 | 10 |
| MD5 | + | 126858 | 126943 | 10 |
| MD5 | + | 113029 | 113551 | 10 |
| MD5 | - | 107042 | 109362 | 10 |
| MD5 | + | 132975 | 133061 | 10 |
| MD5 | - | 111959 | 112157 | 10 |

**Table S2.** List of introns that are: **(Panel A)** spliced exclusively in MDV strain CVI-988; **(Panel B)** spliced exclusively in MDV strain RB-1B; **(Panel C)** equally spliced in MDV strains RB-1B and CVI-988. In order to make splicing events occurring in different MDV strains comparable, all introns are listed in terms of coordinates based on the genomic sequence of MDV reference strain MD5 (NCBI accession NC\_002229.3), CVI-988 (accession number DQ530348) and RB-1B (accession number EF523390). Identifying introns in MD5, RB-1B and CVI-988 was possible thanks to the extremely high sequence similarity (>99%) shared by the three strains. Read coverages can exhibit small variations due to minor local sequence differences.

| MDV strain                                                              | Strand | Position of first intron nucleotide | Position of last intron nucleotide | Read coverage | Gene        | Name  |
|-------------------------------------------------------------------------|--------|-------------------------------------|------------------------------------|---------------|-------------|-------|
| <b>A. Introns only spliced in MDV strain CVI-988</b>                    |        |                                     |                                    |               |             |       |
| MD5                                                                     | -      | 112359                              | 111959                             | 646           | UL49/UL49.5 | I1    |
| RB-1B                                                                   |        | 112673                              | 113073                             | 646           |             |       |
| CVI-988                                                                 |        | 112335                              | 112735                             | 643           |             |       |
| MD5                                                                     | -      | 112881                              | 112500                             | 58            | UL49.5      | I2    |
| RB-1B                                                                   |        | 113214                              | 113595                             | 58            |             |       |
| CVI-988                                                                 |        | 112876                              | 113257                             | 58            |             |       |
| MD5                                                                     | +      | 43021                               | 43723                              | 39            | UL15        | I3    |
| RB-1B                                                                   |        | 43689                               | 44391                              | 39            |             |       |
| CVI-988                                                                 |        | 43469                               | 44171                              | 39            |             |       |
| MD5                                                                     | +      | 43021                               | 43166                              | 42            | UL15        | -     |
| RB-1B                                                                   |        | 43689                               | 43834                              | 43            |             |       |
| CVI-988                                                                 |        | 43469                               | 43614                              | 43            |             |       |
| MD5                                                                     | -      | 108334                              | 107252                             | 29            | UL46/UL47   | -     |
| RB-1B                                                                   |        | 107966                              | 109048                             | 31            |             |       |
| CVI-988                                                                 |        | 107646                              | 108728                             | 31            |             |       |
| MD5                                                                     | +      | 43021                               | 43808                              | 28            | UL15        | -     |
| RB-1B                                                                   |        | 43689                               | 44476                              | 25            |             |       |
| CVI-988                                                                 |        | 43469                               | 44256                              | 25            |             |       |
| MD5                                                                     | +      | 50934                               | 51306                              | 38            | UL21        | -     |
| RB-1B                                                                   |        | 51602                               | 51974                              | 38            |             |       |
| CVI-988                                                                 |        | 51382                               | 51754                              | 38            |             |       |
| <b>B. Introns only spliced in MDV strain RB-1B</b>                      |        |                                     |                                    |               |             |       |
| MD5                                                                     | -      | 111959                              | 112277                             | 19            | UL49/49.5   | -     |
| RB-1B                                                                   |        | 112673                              | 112991                             | 19            |             |       |
| CVI-988                                                                 |        | 112335                              | 112653                             | 19            |             |       |
| <b>C. Intron being equally spliced in MDV strains RB-1B and CVI-988</b> |        |                                     |                                    |               |             |       |
| MD5                                                                     | -      | 170114                              | 170198                             | 260           | LAT         | V.REF |
| RB-1B                                                                   |        | 170838                              | 170922                             | 262           |             |       |
| CVI-988                                                                 |        | 171192                              | 17126                              | 262           |             |       |

**Table S3.** PCR primers and probes used in the paper. They correspond to introns I1, I2, I3 and V.REF of **Table S2**; an additional probe was designed to target an intron of the *GAPDH* gene (see **Materials and Methods section**).

| Name         | Primer F                    | Primer R                     | Probe                                                   |
|--------------|-----------------------------|------------------------------|---------------------------------------------------------|
| I1           | ACGCCGTTCGATTCCG<br>CC      | AAATCACGATCTCGACG<br>AGGATGG | TCCCCATGATAATGCAT<br>TATGAATGTCCAT<br>(FAM/ZEN/3IABLFQ) |
| I2           | CTGCAATTCGGTGTGAT<br>GA     | CTGACAGCAGTTTCTATC<br>GAAGT  | AAACGGTTGGACCTAGA<br>ATGTGGTCC<br>(FAM/ZEN/3IABLFQ)     |
| I3           | GGTTTTGAATCAAGCTA<br>CTTGCA | CTTCTCATTGCCCCATCC<br>AT     | ACAGTGCCTGTTTCAT<br>(FAM/ZEN/3IABLFQ)                   |
| <i>GAPDH</i> | TGGGTGTCAACCATGAG<br>AAATA  | ACCCTCCACAATGCCAA<br>A       | ATTGTCAGCAATGCATC<br>GTGCACC<br>(FAM/ZEN/3IABLFQ)       |
| V.REF        | AATCCCTGGACCGTTG            | GAGGCAGCGTGGTAGAT            | CGCAGCCAGGCATTTAA<br>AGTCTTCC<br>(FAM/ZEN/3IABLFQ)      |



**Figure S1.** Detection of I1 in feather samples. **Panel A** shows 40-Ct values from feather samples experimentally infected with MDV strain RB-1B or vaccinated with MDV strain CVI-988 ( $N = 4$ ; a no template control labelled NTC is also present). In **Panel B**, the 2% agarose gel corresponding to the PCR reactions shown in **panel A** is displayed. A 60 base-pair band (location shown by the arrow on the gel) is detected with I1-specific primers.

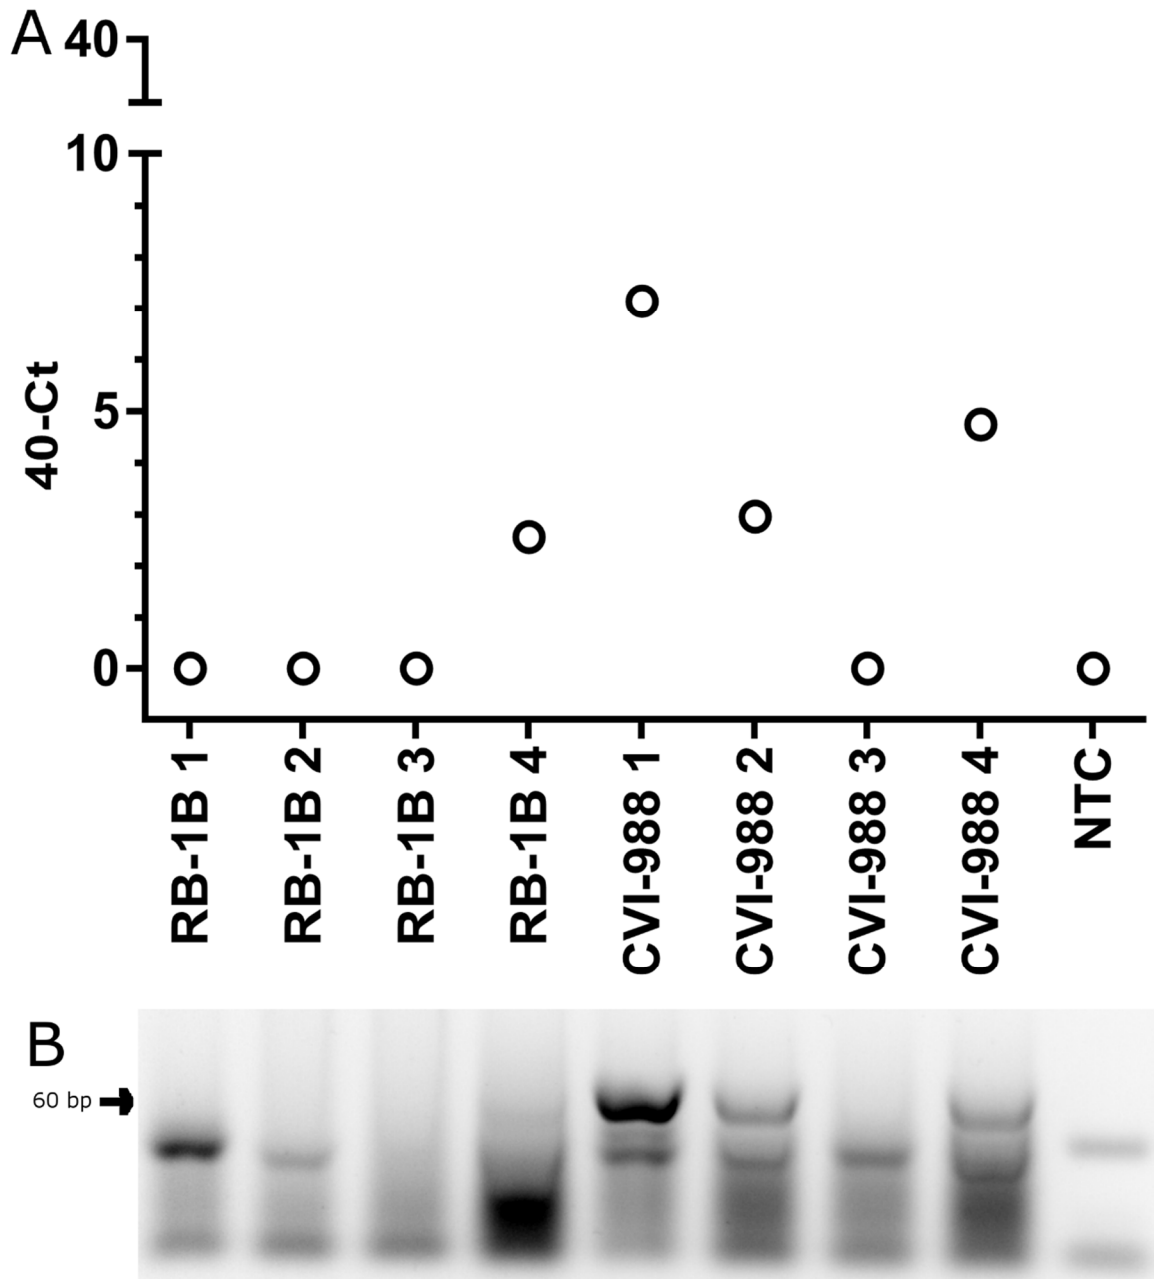

Supplement: viruses-12-00329-s001.pdf [file viruses-12-00329-s001.pdf]
